# Supplementary material
Source: publisher figshare collection journal article supplement (https://acs.figshare.com/ndownloader/files/4729645)
Supplement: Supplementary file 1 [file 4729645]

# **Porous gelatin hydrogels. Part B. *In vitro* cell interaction study**

## **(SUPPORTING INFORMATION)**

P. Dubruel<sup>1,2,\*</sup>, R. Unger<sup>2</sup>, S. Van Vlierberghe<sup>1</sup>, V. Cnudde<sup>3</sup>, P. Jacobs<sup>3</sup>,

E. Schacht<sup>1</sup> and C.J. Kirkpatrick<sup>2</sup>

<sup>1</sup> Polymer Chemistry & Biomaterials Research Group, Ghent University, Ghent, Belgium

<sup>2</sup> Institute of Pathology, Johannes Gutenberg University, Mainz, Germany

<sup>3</sup> Department of Geology and Soil Science, Ghent University, Ghent, Belgium.

---

\* Corresponding author: Dr. Peter Dubruel

Krijgslaan 281 (Building S4 Bis)

B-9000 Ghent

e-mail: Peter.Dubruel@UGent.be

tel: 003292644466

fax: 003292644972

### **Preliminary study of calcification within CAL-72 seeded hydrogels**

CAL-72 seeded hydrogels were cultured for 4 weeks in DMEM (Dulbecco's Modified Eagle Medium, Sigma) supplied with 10% FCS, 1% Penicillin/Streptomycin (Gibco) and 2% Glutamax (Gibco) at 37°C (5% CO<sub>2</sub>). Culture medium was changed twice a week. After four weeks, calcein (Sigma-Aldrich) was added to the medium at a concentration of 5µg/ml. After two days, the medium was changed and possible fluorescence related to calcification in the hydrogel was measured using confocal microscopy (Leica TCS NT,  $\lambda_{\text{ex}} = \lambda_{\text{em}} =$ ). The results, shown in the figure below clearly indicate regions where nodules can be observed.

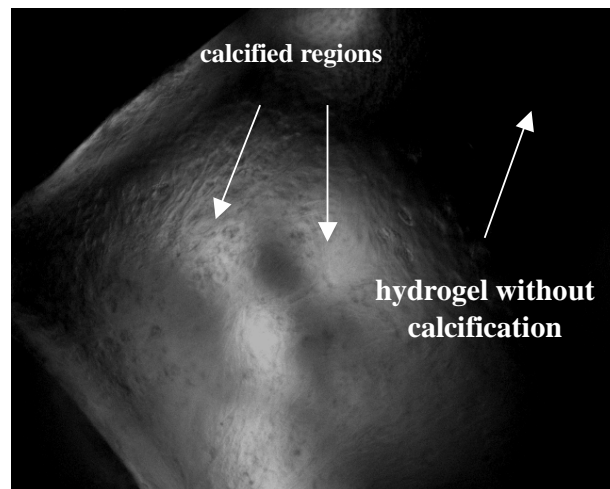

**Figure 1.** Calcification within CAL-72 seeded gelatin hydrogels  
as visualised by confocal microscopy.
